# Supplementary material
Source: PubMed Central journal article supplement (PMC3322665)
Supplement: NIHMS356948-supplement-Appendix.pdf [file NIHMS356948-supplement-Appendix.pdf]

■ **eAppendix. International Classification of Diseases, Ninth Revision Codes for Mental Health Condition Categories**

**Affective disorders**

296.00-296.06, 296.10-296.16, 296.20-296.26, 296.30-296.36, 296.40-296.46, 296.50-296.56, 296.60-296.66, 296.7, 296.80, 296.82, 296.89, 296.90, 296.99, 298.0, 300.4, 301.11, 301.13

**Schizophrenia and related disorders**

295.00-295.05, 295.10-295.15, 295.20-295.25, 295.30-295.35, 295.40-295.45, 295.50-295.55, 295.60-295.65, 295.70-295.75, 295.80-295.85, 295.90-295.95, 297.0, 297.3, 297.8, 297.9, 298.1, 298.4, 298.8, 298.9, 299.00-299.01, 299.10, 299.11, 299.80, 299.81, 299.90, 299.91

**Anxiety, somatoform, dissociative, and personality disorders**

300.00-300.02, 300.09-300.16, 300.20-300.23, 300.29, 300.3, 300.5-300.7, 300.81, 300.82, 301.10, 301.12, 301.20-301.22, 301.3, 301.4, 301.50, 301.51, 301.59, 301.6, 301.81-301.84, 301.89, 301.9, 307.40-307.44, 307.47-307.49, 307.80, 307.81, 307.89, 307.9, 308.0-308.3, 308.9, 309.81, 312.30-312.35, 312.39
